# Supplementary material for: Focus group on conflict management in the classroom in Secondary Education in Costa Rica: mixed methods approach
Source: Front Psychol. 2024 Oct 3;15:1407433. doi: 10.3389/fpsyg.2024.1407433 (PMC11483860; doi:10.3389/fpsyg.2024.1407433)
Supplement: Supplementary file 7 [file Data_Sheet_3.pdf]

Supplementary material  
Question 3 Coded answers

|             |               | 1. Typology of the conflict |               |              |          |                | 2. Aspects that affect the emergence of the conflict |          |           | 3. Coping strategy |               |              |              |               | 4. Teaching skills to manage conflict |                                       |              |                  |
|-------------|---------------|-----------------------------|---------------|--------------|----------|----------------|------------------------------------------------------|----------|-----------|--------------------|---------------|--------------|--------------|---------------|---------------------------------------|---------------------------------------|--------------|------------------|
| Participant | Textual Units | A. Interpersonal            | B. Structural | C. Interests | D. Value | E. Information | A. Individual                                        | B. Group | C. Social | A. Integration     | B. Domination | C. Servility | D. Evitation | E. Commitment | A. Social                             | B. Emotional for conflict negotiation | C. Cognitive | D. Communication |
| 1           | 1             |                             |               |              |          |                |                                                      |          |           |                    |               |              |              |               |                                       |                                       |              |                  |
|             | 2             |                             |               |              |          |                |                                                      |          |           |                    |               |              |              |               |                                       |                                       |              |                  |
|             | 3             |                             |               |              |          |                |                                                      |          | 2C3TCD    |                    |               |              |              |               |                                       |                                       |              |                  |
|             | 4             |                             |               |              |          |                |                                                      |          |           |                    |               |              |              | 3E1APBSI      |                                       |                                       | 4C1APCC      |                  |
| 2           | 5             |                             |               |              |          |                | 2A2CPEN                                              |          |           |                    |               |              | 3D1BIPGN     |               |                                       |                                       |              |                  |
|             | 6             |                             |               |              |          |                |                                                      |          |           |                    |               |              |              | 3E1APBSI      |                                       |                                       |              | 4D3CI            |
|             | 7             |                             |               |              |          |                |                                                      |          |           |                    |               |              |              | 3E1APBSI      |                                       | 4B1RE                                 |              |                  |
| 3           | 8             |                             |               |              |          |                |                                                      |          |           |                    |               |              |              | 3E1APBSI      |                                       |                                       |              | 4D2UTVA          |
|             | 9             |                             |               |              |          |                |                                                      |          |           |                    |               |              |              |               |                                       |                                       |              | 4D2UTVA          |
|             | 10            |                             |               |              |          |                |                                                      |          |           |                    |               |              |              |               |                                       |                                       |              |                  |
| 4           | 11            |                             |               | 1C4NI        |          |                |                                                      |          |           |                    |               |              |              | 3E1APBSI      | 4A2CPS                                |                                       |              |                  |
|             | 12            |                             |               |              |          |                |                                                      |          |           |                    |               |              |              | 3E1APBSI      | 4A1EPC                                |                                       |              |                  |
|             | 13            |                             |               | 1C4NI        |          |                |                                                      |          |           |                    |               |              |              |               |                                       |                                       |              |                  |
|             | 14            |                             |               |              |          |                |                                                      |          | 3A1PSFAPC |                    |               |              |              |               |                                       |                                       | 4C1APCC      |                  |
| 5           | 15            | 1A4ICR                      |               |              |          |                |                                                      |          | 2C1FHS    |                    |               |              |              |               |                                       |                                       |              |                  |
|             | 16            |                             |               |              |          |                |                                                      |          |           |                    |               |              |              |               |                                       |                                       |              |                  |
|             | 17            |                             |               |              |          |                |                                                      |          |           | 3A1PSFAPC          |               |              |              |               | 4A2CPS                                |                                       |              |                  |
|             | 18            |                             |               |              |          |                |                                                      |          |           | 3A1PSFAPC          |               |              |              |               | 4A2CPS                                |                                       |              |                  |
|             | 19            |                             |               |              |          |                |                                                      |          |           |                    |               |              |              |               |                                       |                                       |              |                  |
|             | 20            |                             |               |              |          |                |                                                      |          |           |                    |               |              |              | 3E1APBSI      |                                       | 4B3DPEAC                              |              |                  |
| 6           | 21            |                             |               |              |          |                |                                                      |          |           |                    | 3B1SIP        |              |              |               |                                       |                                       |              |                  |
|             | 22            |                             |               |              |          |                | 2A2CPEN                                              |          |           |                    |               |              |              | 3E1APBSI      | 4A2CPS                                |                                       |              |                  |
|             | 23            |                             |               |              |          |                |                                                      | 2B1FC    |           |                    |               |              |              |               |                                       |                                       |              |                  |
| 7           | 24            |                             |               |              |          |                |                                                      |          |           |                    |               |              |              | 3E1APBSI      |                                       | 4B4FCSC                               |              |                  |
|             | 25            |                             |               |              |          |                |                                                      |          | 2C1FHS    |                    |               |              |              |               |                                       |                                       |              |                  |
|             | 26            |                             |               |              |          |                |                                                      |          |           |                    |               |              |              |               |                                       |                                       |              |                  |
|             | 27            |                             |               |              |          |                |                                                      |          |           | 3A1PSFAPC          |               |              |              |               | 4A1EPC                                |                                       |              |                  |
|             | 28            |                             |               |              |          |                |                                                      |          | 3A1PSFAPC |                    |               |              |              |               |                                       | 4B4FCSC                               |              |                  |
|             | 29            |                             |               |              |          |                |                                                      |          |           |                    |               |              |              |               |                                       |                                       |              |                  |
| 8           | 30            |                             |               |              |          |                |                                                      |          | 2C1FHS    | 3A1PSFAPC          |               |              |              |               |                                       | 4A2CPS                                |              |                  |
|             | 31            |                             |               |              |          |                |                                                      |          |           |                    |               | 3C1UPCO      |              |               |                                       |                                       | 4C1APCC      |                  |
|             | 32            |                             |               |              |          |                |                                                      |          |           |                    |               |              | 3D1BIPGN     |               |                                       | 4B2TPC                                |              |                  |
|             | 33            |                             |               |              |          |                |                                                      |          | 3A1PSFAPC |                    |               |              |              |               |                                       | 4B4FCSC                               |              |                  |
| 9           | 34            |                             |               |              |          |                |                                                      |          |           |                    |               |              |              | 3E1APBSI      | 4A1EPC                                |                                       |              |                  |
|             | 35            |                             |               |              |          |                |                                                      |          |           |                    | 3B1SIP        |              |              |               |                                       |                                       |              |                  |
|             | 36            |                             |               |              |          |                |                                                      |          |           |                    | 3B1SIP        |              |              |               |                                       | 4B1RE                                 |              |                  |
| 10          | 37            |                             |               |              |          |                |                                                      |          |           |                    | 3B1SIP        |              |              |               |                                       |                                       |              |                  |
|             | 38            |                             |               |              |          |                |                                                      |          | 3A1PSFAPC |                    |               |              |              |               | 4A2CPS                                |                                       |              |                  |
|             | 39            |                             |               |              |          |                |                                                      |          |           |                    |               |              | 3D1BIPGN     |               |                                       |                                       |              |                  |
|             | 40            |                             |               |              |          |                |                                                      |          | 2C1FHS    |                    |               |              |              |               |                                       |                                       |              |                  |
|             | 41            |                             |               |              |          |                |                                                      | 2C1FHS   |           |                    |               |              |              |               |                                       |                                       |              |                  |
| 11          | 42            |                             |               |              |          |                |                                                      |          |           |                    |               |              |              |               |                                       |                                       |              |                  |
|             | 43            |                             |               |              |          |                |                                                      |          |           | 3A1PSFAPC          |               | 3B1SIP       |              |               |                                       |                                       |              |                  |
|             | 44            |                             |               |              |          |                |                                                      |          |           |                    |               |              |              |               |                                       |                                       |              |                  |
|             | 45            |                             |               |              |          |                |                                                      |          |           |                    |               |              | 3D1BIPGN     |               |                                       |                                       |              |                  |
| 12          | 46            |                             | 1B2FAI        |              |          |                |                                                      |          |           |                    |               |              | 3D1BIPGN     |               |                                       |                                       |              |                  |
|             | 47            |                             |               |              |          |                |                                                      |          |           |                    |               |              | 3D1BIPGN     |               |                                       |                                       |              |                  |
|             | 48            |                             |               |              |          |                |                                                      |          |           |                    |               |              |              |               |                                       |                                       |              |                  |
|             | 49            |                             |               |              |          |                |                                                      |          |           |                    |               |              | 3D1BIPGN     |               |                                       |                                       |              |                  |
|             | 50            |                             | 1B2FAI        |              |          |                |                                                      |          |           |                    |               |              |              |               |                                       |                                       |              |                  |
|             | 51            |                             |               |              |          | 1E1EITD        |                                                      |          |           |                    |               |              |              |               |                                       |                                       |              |                  |
| 13          | 52            |                             |               |              |          |                |                                                      |          |           |                    |               |              |              | 3D1BIPGN      |                                       |                                       |              |                  |
|             | 53            |                             | 1B2FAI        |              |          |                |                                                      |          |           |                    |               |              |              | 3D1BIPGN      |                                       |                                       |              |                  |
| 14          | 54            |                             |               |              |          |                |                                                      |          |           |                    |               |              |              | 3D1BIPGN      |                                       |                                       |              |                  |
|             | 55            |                             |               |              |          |                |                                                      |          |           |                    |               |              |              |               |                                       |                                       |              |                  |
|             | 56            |                             |               |              |          |                |                                                      |          |           |                    |               |              |              | 3D1BIPGN      |                                       |                                       |              |                  |
|             | 57            |                             |               |              |          |                |                                                      |          |           |                    |               |              |              |               |                                       |                                       |              |                  |
|             | 58            |                             |               |              |          |                |                                                      |          |           |                    |               |              |              |               |                                       |                                       |              |                  |
|             | 59            |                             | 1B2FAI        |              |          |                |                                                      |          |           |                    |               |              |              | 3D1BIPGN      |                                       |                                       |              |                  |
|             | 60            |                             |               |              |          |                |                                                      |          |           |                    |               |              |              |               |                                       |                                       |              |                  |
