# Supplementary material for: Focus group on conflict management in the classroom in Secondary Education in Costa Rica: mixed methods approach
Source: PubMed Central journal article supplement (PMC11483860; doi:10.3389/fpsyg.2024.1407433), 2024-10-03
Supplement: Table_1.pdf [file Table_1.pdf]

**Table 1**

Adjusted residuals corresponding to the lag sequential analysis considering IAIAV as given behavior, all categories as conditioned behaviors, prospective lags R+1 to R+5, and retrospective lags R-1 to R-5.

| Codes        | Lag -5<br>1A_1A1AV | Lag -4<br>1A_1A1AV | Lag -3<br>1A_1A1AV | Lag -2<br>1A_1A1AV | Lag -1<br>1A_1A1AV | Lag +1<br>1A_1A1AV | Lag +2<br>1A_1A1AV | Lag +3<br>1A_1A1AV | Lag +4<br>1A_1A1AV | Lag +5<br>1A_1A1AV |
|--------------|--------------------|--------------------|--------------------|--------------------|--------------------|--------------------|--------------------|--------------------|--------------------|--------------------|
| 1A_1A1AV     | -0,301             | -0,301             | -0,3               | -0,299             | <b>3,204</b>       | <b>3,204</b>       | -0,299             | -0,3               | -0,301             | -0,301             |
| 1A_1A2AF     | -0,338             | -0,337             | -0,336             | -0,335             | -0,334             | <b>2,807</b>       | -0,335             | -0,336             | -0,337             | 2,771              |
| 1A_1A3I      | -0,301             | -0,301             | <b>3,185</b>       | -0,299             | -0,298             | -0,298             | -0,299             | -0,3               | -0,301             | -0,301             |
| 1A_1A4ICR    | -0,301             | -0,301             | -0,3               | 3,195              | <b>3,204</b>       | <b>3,204</b>       | <b>3,195</b>       | -0,3               | -0,301             | -0,301             |
| 1A_1A5CNR    | -0,338             | -0,337             | -0,336             | -0,335             | -0,334             | -0,298             | -0,299             | -0,259             | -0,26              | -0,26              |
| 1B_1B1DIRAC  | 2,149              | 0,637              | -0,815             | -0,831             | 0,574              | -0,863             | -0,866             | -0,869             | -0,872             | -0,875             |
| 1B_1B2FAI    | -0,51              | -0,508             | -0,531             | -0,529             | -0,528             | -0,528             | -0,529             | -0,531             | 1,52               | <b>3,561</b>       |
| 1B_1B3RP     | <b>2,475</b>       | -0,37              | -0,369             | -0,368             | <b>2,508</b>       | -0,367             | -0,368             | -0,369             | -0,37              | -0,371             |
| 1C_1C1CO     | -0,26              | -0,26              | -0,259             | -0,258             | -0,257             | -0,257             | -0,258             | <b>3,754</b>       | -0,26              | -0,212             |
| 1C_1C2NCIOP  | -0,431             | -0,43              | <b>2,063</b>       | 2,07               | -0,426             | -0,426             | -0,427             | -0,429             | -0,43              | -0,431             |
| 1C_1C3DPC    | -0,26              | <b>3,743</b>       | <b>3,754</b>       | -0,258             | -0,257             | -0,257             | <b>3,765</b>       | -0,259             | -0,26              | -0,26              |
| 1C_1C4NI     | -0,371             | <b>2,483</b>       | -0,369             | -0,368             | -0,367             | -0,367             | -0,368             | <b>2,492</b>       | <b>5,337</b>       | -0,371             |
| 1D_1D1ICOP   | -0,212             | -0,211             | -0,211             | -0,21              | -0,21              | -0,21              | -0,21              | -0,211             | -0,211             | -0,212             |
| 1D_1D2NCOOP  | <b>3,731</b>       | <b>3,743</b>       | <b>3,754</b>       | <b>3,765</b>       | -0,257             | -0,257             | -0,258             | -0,259             | -0,26              | -0,26              |
| 1E_1E1EITD   | -0,26              | -0,26              | -0,259             | -0,258             | -0,257             | -0,257             | <b>3,765</b>       | -0,259             | -0,26              | -0,26              |
| 1E_1E2DII    | -0,301             | -0,301             | -0,3               | <b>3,195</b>       | -0,298             | -0,298             | <b>3,195</b>       | <b>3,185</b>       | -0,301             | -0,301             |
| 2A_2A1PEC    | 1,326              | -0,579             | 1,339              | 1,345              | -0,573             | -0,573             | -0,553             | -0,554             | -0,533             | -0,534             |
| 2A_2A2CPEN   | 1,415              | -0,556             | -0,554             | -0,553             | -0,551             | 1,441              | -0,553             | -0,554             | -0,556             | 1,415              |
| 2B_2B1FC     | -0,431             | -0,43              | -0,429             | -0,427             | -0,426             | -0,426             | -0,427             | -0,429             | -0,43              | <b>2,048</b>       |
| 2B_2B2FIG    | -0,371             | -0,37              | -0,369             | -0,368             | <b>2,508</b>       | -0,367             | -0,368             | -0,369             | -0,37              | -0,371             |
| 2C_2C1FHS    | -0,745             | -0,743             | -0,741             | 0,831              | 0,836              | 0,836              | 0,831              | -0,741             | -0,743             | -0,745             |
| 2C_2C2TCA    | -0,149             | -0,149             | -0,149             | -0,148             | -0,148             | -0,148             | -0,148             | -0,149             | -0,149             | -0,149             |
| 2C_2C3TCD    | -0,301             | -0,301             | -0,3               | -0,299             | -0,298             | -0,298             | -0,299             | <b>3,185</b>       | -0,301             | -0,301             |
| 3A_3A1PSFAPC | -0,51              | 1,629              | -0,507             | -0,505             | -0,504             | -0,504             | -0,505             | -0,507             | -0,508             | -0,51              |
| 3B_3B1SIP    | -0,459             | -0,457             | -0,456             | -0,455             | -0,453             | -0,453             | -0,455             | -0,456             | -0,457             | 1,885              |
| 3C_3C1UPCO   | -0,338             | -0,337             | -0,336             | -0,335             | -0,334             | -0,334             | -0,335             | -0,336             | -0,337             | 2,771              |
| 3D_3D1BIPGN  | -0,645             | 1,107              | 1,113              | -0,639             | -0,637             | -0,637             | -0,639             | -0,641             | -0,643             | 1,101              |
| 3E_3E1APBSI  | -0,51              | -0,508             | -0,507             | -0,505             | -0,504             | -0,504             | -0,505             | -0,507             | 1,629              | -0,51              |
| 4A_4A1EPC    | -0,301             | -0,301             | -0,3               | -0,299             | -0,298             | -0,298             | -0,299             | -0,3               | -0,301             | -0,301             |
| 4A_4A2CPS    | -0,558             | 1,422              | -0,554             | -0,553             | -0,551             | -0,551             | -0,553             | -0,554             | -0,556             | -0,558             |
| 4B_4B1RE     | -0,301             | -0,301             | -0,3               | -0,299             | -0,298             | -0,298             | -0,299             | -0,3               | -0,301             | -0,301             |
| 4B_4B2TPC    | -0,149             | -0,149             | -0,149             | -0,148             | -0,148             | -0,148             | -0,148             | -0,149             | -0,149             | -0,149             |
| 4B_4B3DPEAC  | -0,26              | -0,26              | -0,259             | -0,258             | -0,257             | -0,257             | -0,258             | -0,259             | -0,26              | -0,26              |
| 4B_4B4FCSC   | -0,301             | -0,301             | -0,3               | -0,299             | -0,298             | -0,298             | -0,299             | -0,3               | -0,301             | -0,301             |
| 4C_4C1APCC   | -0,371             | -0,37              | -0,369             | -0,368             | -0,367             | -0,367             | -0,368             | -0,369             | <b>2,483</b>       | -0,371             |
| 4D_4D1EA     | -0,149             | -0,149             | -0,149             | -0,148             | -0,148             | -0,148             | -0,148             | -0,149             | -0,149             | -0,149             |
| 4D_4D2UTVA   | -0,212             | -0,211             | -0,211             | -0,21              | -0,21              | -0,21              | -0,21              | -0,211             | -0,211             | -0,212             |
| 4D_4D3CI     | -0,212             | -0,211             | -0,211             | -0,21              | -0,21              | -0,21              | -0,21              | -0,211             | -0,211             | -0,212             |
