# Supplementary material for: Focus group on conflict management in the classroom in Secondary Education in Costa Rica: mixed methods approach
Source: PubMed Central journal article supplement (PMC11483860; doi:10.3389/fpsyg.2024.1407433), 2024-10-03
Supplement: Table_2.pdf [file Table_2.pdf]

**Table 2**

Adjusted residuals corresponding to the lag sequential analysis considering 2A1PEC as given behavior, all categories as conditioned behaviors, prospective lags R+1 to R+5, and retrospective lags R-1 to R-5.

| Codes           | Lag -5<br>2A_2A1PEC | Lag -4<br>2A_2A1PEC | Lag -3<br>2A_2A1PEC | Lag -2<br>2A_2A1PEC | Lag -1<br>2A_2A1PEC | Lag +1<br>2A_2A1PEC | Lag +2<br>2A_2A1PEC | Lag +3<br>2A_2A1PEC | Lag +4<br>2A_2A1PEC | Lag +5<br>2A_2A1PEC |
|-----------------|---------------------|---------------------|---------------------|---------------------|---------------------|---------------------|---------------------|---------------------|---------------------|---------------------|
| 1A_1A1AV        | -0,534              | -0,533              | -0,554              | -0,553              | -0,573              | -0,573              | 1,345               | 1,339               | -0,579              | 1,326               |
| 1A_1A2AF        | 1,238               | -0,597              | -0,621              | -0,62               | -0,643              | 1,084               | -0,645              | 1,072               | -0,649              | 1,06                |
| 1A_1A3I         | -0,534              | -0,533              | -0,554              | -0,553              | 1,352               | -0,573              | -0,575              | -0,577              | 1,333               | -0,58               |
| 1A_1A4ICR       | -0,534              | -0,533              | -0,554              | -0,553              | -0,573              | -0,573              | -0,575              | -0,577              | 1,333               | -0,58               |
| 1A_1A5CNR       | <b>3,074</b>        | -0,597              | 1,157               | 1,163               | <b>4,537</b>        | 3,277               | 1,345               | -0,498              | -0,5                | -0,501              |
| 1B_1B1DIRAC     | -1,421              | -0,59               | -0,678              | 0,101               | 0,714               | -1,661              | 0,636               | -0,906              | 0,616               | -0,921              |
| 1B_1B2FAI       | 0,356               | -0,901              | 0,189               | -0,979              | 0,121               | 0,121               | -1,019              | -1,022              | -1,025              | -1,028              |
| 1B_1B3RP        | -0,658              | <b>2,714</b>        | <b>2,573</b>        | 0,951               | -0,706              | <b>2,455</b>        | <b>2,445</b>        | -0,71               | 0,857               | 0,851               |
| 1C_1C1CO        | -0,461              | -0,46               | -0,479              | -0,477              | 1,722               | 1,722               | -0,497              | 1,708               | -0,5                | -0,408              |
| 1C_1C2NCIOP     | 0,7                 | <b>2,174</b>        | 0,625               | 0,631               | -0,82               | 0,556               | 0,551               | 0,545               | <b>3,273</b>        | <b>3,26</b>         |
| 1C_1C3DPC       | -0,461              | -0,46               | -0,479              | -0,477              | 1,722               | 1,722               | 1,715               | 1,708               | -0,5                | -0,501              |
| 1C_1C4NI        | -0,658              | -0,656              | -0,683              | -0,681              | -0,706              | -0,706              | -0,708              | 0,863               | -0,713              | 0,851               |
| 1D_1D1COP       | <b>2,504</b>        | -0,374              | <b>5,187</b>        | -0,389              | <b>2,305</b>        | -0,403              | -0,404              | <b>2,289</b>        | -0,407              | <b>4,955</b>        |
| 1D_1D2NCOOP     | -0,461              | -0,46               | -0,479              | -0,477              | -0,495              | 1,722               | -0,497              | 1,708               | -0,5                | -0,501              |
| 1E_1E1EITD      | -0,461              | 1,904               | -0,479              | -0,477              | -0,495              | -0,495              | -0,497              | -0,498              | 1,701               | 1,694               |
| 1E_1E2DII       | -0,534              | -0,533              | -0,554              | -0,553              | -0,573              | -0,573              | -0,575              | -0,577              | -0,579              | 1,326               |
| 2A_2A1PEC       | 0,098               | 1,232               | 1,113               | <b>2,214</b>        | -0,045              | -0,045              | <b>2,214</b>        | 1,113               | 1,232               | 0,098               |
| 2A_2A2CPEN      | 0,177               | 1,351               | 1,231               | 1,239               | <b>2,225</b>        | 0,035               | <b>3,307</b>        | <b>2,204</b>        | 1,105               | 0,012               |
| 2B_2B1FC        | <b>2,164</b>        | 0,706               | 0,625               | 0,631               | 0,556               | -0,82               | -0,822              | -0,825              | -0,827              | -0,83               |
| 2B_2B2FIG       | -0,658              | -0,656              | -0,683              | -0,681              | -0,706              | 0,874               | 0,868               | 0,863               | 0,857               | 0,851               |
| 2C_2C1FHS       | 1,44                | -0,394              | 0,412               | 1,312               | -1,416              | 1,177               | -1,42               | -1,425              | 1,147               | -1,435              |
| 2C_2C2TCA       | -0,265              | -0,264              | -0,275              | -0,274              | -0,284              | -0,284              | -0,285              | -0,286              | -0,287              | -0,288              |
| 2C_2C3TCD       | 1,513               | 1,52                | -0,554              | -0,553              | 1,352               | -0,573              | 1,345               | -0,577              | -0,579              | 1,326               |
| 3A_3A1PSFAPC    | -0,903              | -0,901              | -0,937              | -0,934              | -0,97               | -0,97               | -0,973              | 0,203               | -0,979              | 0,191               |
| 3B_3B1SIP       | -0,813              | 0,578               | 0,497               | -0,84               | 0,429               | -0,872              | -0,875              | 0,418               | -0,88               | 0,406               |
| 3C_3C1UPCO      | -0,599              | -0,597              | <b>2,935</b>        | -0,62               | <b>2,81</b>         | 1,084               | -0,645              | -0,647              | -0,649              | -0,651              |
| 3D_3D1BIPGN     | -1,143              | -0,106              | -1,186              | -0,182              | -1,226              | -1,226              | 0,703               | -1,234              | -1,238              | -0,282              |
| 3E_3E1APBSI     | -0,903              | -0,901              | -0,937              | 0,288               | -0,97               | 0,214               | -0,973              | -0,976              | -0,979              | -0,982              |
| 4A_4A1EPC       | -0,534              | -0,533              | -0,554              | -0,553              | -0,573              | -0,573              | -0,575              | -0,577              | -0,579              | -0,58               |
| 4A_4A2CPS       | 0,177               | 0,183               | -1,025              | -1,022              | 0,035               | 0,035               | -1,063              | 1,113               | -1,07               | 0,012               |
| 4B_4B1RE        | -0,534              | -0,533              | -0,554              | -0,553              | -0,573              | -0,573              | -0,575              | -0,577              | -0,579              | -0,58               |
| 4B_4B2TPC       | -0,265              | -0,264              | -0,275              | -0,274              | -0,284              | -0,284              | -0,285              | -0,286              | -0,287              | -0,288              |
| 4B_4B3DPEAC     | -0,461              | -0,46               | -0,479              | -0,477              | -0,495              | -0,495              | -0,497              | -0,498              | -0,5                | -0,501              |
| 4B_4B4FCSC      | -0,534              | -0,533              | -0,554              | -0,553              | -0,573              | -0,573              | -0,575              | -0,577              | -0,579              | -0,58               |
| 4C_4C1APCC      | -0,658              | -0,656              | 0,945               | 0,951               | -0,706              | 0,874               | -0,708              | -0,71               | -0,713              | -0,715              |
| 4D_4D1EA        | -0,265              | -0,264              | -0,275              | -0,274              | -0,284              | -0,284              | -0,285              | -0,286              | -0,287              | -0,288              |
| 4D_4D2UTVA      | -0,376              | -0,374              | -0,39               | -0,389              | -0,403              | -0,403              | -0,404              | -0,406              | -0,407              | -0,408              |
| 4D_4D3CI        | -0,376              | -0,374              | -0,39               | -0,389              | -0,403              | -0,403              | -0,404              | -0,406              | -0,407              | -0,408              |
| PARTICIPANTE_P1 | 0,265               | 0,264               | 0,275               | 0,274               | 0,284               | 0,284               | 0,285               | 0,286               | 0,287               | 0,288               |
