# Supplementary material for: Focus group on conflict management in the classroom in Secondary Education in Costa Rica: mixed methods approach
Source: PubMed Central journal article supplement (PMC11483860; doi:10.3389/fpsyg.2024.1407433), 2024-10-03
Supplement: Table_3.pdf [file Table_3.pdf]

**Table 3**

Adjusted residuals corresponding to the lag sequential analysis considering 3A1PSFAPC as given behavior, all categories as conditioned behaviors, prospective lags R+1 to R+5, and retrospective lags R-1 to R-5.

| Codes        | Lag -5<br>3A_3A1PSFAPC | Lag -4<br>3A_3A1PSFAPC | Lag -3<br>3A_3A1PSFAPC | Lag -2<br>3A_3A1PSFAPC | Lag -1<br>3A_3A1PSFAPC | Lag +1<br>3A_3A1PSFAPC | Lag +2<br>3A_3A1PSFAPC | Lag +3<br>3A_3A1PSFAPC | Lag +4<br>3A_3A1PSFAPC | Lag +5<br>3A_3A1PSFAPC |
|--------------|------------------------|------------------------|------------------------|------------------------|------------------------|------------------------|------------------------|------------------------|------------------------|------------------------|
| 1A_1A1AV     | -0,51                  | -0,508                 | -0,507                 | -0,505                 | -0,504                 | -0,504                 | -0,505                 | -0,507                 | 1,629                  | -0,51                  |
| 1A_1A2AF     | -0,572                 | -0,57                  | -0,568                 | -0,567                 | -0,565                 | -0,565                 | -0,567                 | -0,568                 | -0,57                  | 1,341                  |
| 1A_1A3I      | -0,51                  | -0,508                 | -0,507                 | -0,505                 | -0,504                 | -0,504                 | -0,505                 | -0,507                 | -0,508                 | -0,51                  |
| 1A_1A4ICR    | -0,51                  | -0,508                 | 1,636                  | 1,643                  | -0,504                 | 1,649                  | -0,505                 | -0,507                 | -0,508                 | -0,51                  |
| 1A_1A5CNR    | -0,572                 | 1,347                  | -0,568                 | -0,567                 | -0,565                 | -0,504                 | -0,505                 | -0,438                 | -0,439                 | -0,44                  |
| 1B_1B1DIRAC  | -1,356                 | -0,488                 | -0,482                 | -1,404                 | -0,557                 | -1,46                  | -1,465                 | -0,613                 | -1,474                 | -0,626                 |
| 1B_1B2FAI    | -0,862                 | -0,86                  | -0,898                 | -0,895                 | -0,893                 | -0,893                 | -0,895                 | 0,367                  | 0,362                  | 0,356                  |
| 1B_1B3RP     | -0,628                 | -0,626                 | -0,624                 | -0,622                 | -0,621                 | -0,621                 | -0,622                 | -0,624                 | -0,626                 | -0,628                 |
| 1C_1C1CO     | -0,44                  | -0,439                 | -0,438                 | <b>2,037</b>           | -0,435                 | -0,435                 | -0,437                 | -0,438                 | -0,439                 | -0,359                 |
| 1C_1C2NCIOP  | -0,729                 | -0,727                 | -0,725                 | -0,723                 | -0,721                 | 0,819                  | -0,723                 | -0,725                 | -0,727                 | -0,729                 |
| 1C_1C3DPC    | -0,44                  | -0,439                 | -0,438                 | -0,437                 | -0,435                 | -0,435                 | -0,437                 | -0,438                 | -0,439                 | -0,44                  |
| 1C_1C4NI     | 1,123                  | 1,129                  | 1,135                  | -0,622                 | 1,147                  | -0,621                 | -0,622                 | -0,624                 | -0,626                 | -0,628                 |
| 1D_1D1ICOP   | -0,359                 | -0,358                 | -0,356                 | -0,355                 | -0,354                 | -0,354                 | -0,355                 | -0,356                 | -0,358                 | -0,359                 |
| 1D_1D2NCCOOP | -0,44                  | -0,439                 | -0,438                 | -0,437                 | -0,435                 | -0,435                 | -0,437                 | -0,438                 | -0,439                 | -0,44                  |
| 1E_1E1EITD   | -0,44                  | -0,439                 | -0,438                 | -0,437                 | -0,435                 | -0,435                 | -0,437                 | -0,438                 | -0,439                 | -0,44                  |
| 1E_1E2DII    | -0,51                  | -0,508                 | -0,507                 | -0,505                 | -0,504                 | -0,504                 | 1,643                  | -0,507                 | -0,508                 | -0,51                  |
| 2A_2A1PEC    | 0,191                  | -0,979                 | 0,203                  | -0,973                 | -0,97                  | -0,97                  | -0,934                 | -0,937                 | -0,901                 | -0,903                 |
| 2A_2A2CPEN   | 0,27                   | 0,276                  | -0,937                 | -0,934                 | -0,932                 | -0,932                 | -0,934                 | 0,282                  | 0,276                  | -0,943                 |
| 2B_2B1FC     | 0,796                  | 0,801                  | 0,807                  | -0,723                 | -0,721                 | -0,721                 | -0,723                 | -0,725                 | 0,801                  | 0,796                  |
| 2B_2B2FIG    | -0,628                 | -0,626                 | -0,624                 | -0,622                 | -0,621                 | -0,621                 | -0,622                 | -0,624                 | -0,626                 | -0,628                 |
| 2C_2C1FHS    | -1,26                  | -0,296                 | <b>2,598</b>           | 1,646                  | -0,278                 | 1,656                  | 0,681                  | -0,29                  | -1,256                 | -1,26                  |
| 2C_2C2TCA    | -0,253                 | -0,252                 | -0,251                 | -0,251                 | -0,25                  | -0,25                  | <b>4,011</b>           | -0,251                 | -0,252                 | -0,253                 |
| 2C_2C3TCD    | -0,51                  | -0,508                 | -0,507                 | -0,505                 | -0,504                 | -0,504                 | -0,505                 | -0,507                 | -0,508                 | -0,51                  |
| 3A_3A1PSFAPC | <b>3,072</b>           | 1,769                  | 1,778                  | 0,466                  | <b>3,12</b>            | <b>3,12</b>            | 0,466                  | 1,778                  | 1,769                  | <b>3,072</b>           |
| 3B_3B1SIP    | 0,666                  | -0,773                 | 0,678                  | 0,683                  | <b>2,145</b>           | -0,766                 | <b>2,135</b>           | <b>2,126</b>           | 2,117                  | 0,666                  |
| 3C_3C1UPCO   | -0,572                 | -0,57                  | -0,568                 | 1,36                   | -0,565                 | 1,366                  | 1,36                   | 1,354                  | -0,57                  | -0,572                 |
| 3D_3D1BIPGN  | -1,091                 | -0,012                 | -1,084                 | -1,081                 | 0,006                  | 1,089                  | 1,081                  | 1,073                  | 1,065                  | -1,091                 |
| 3E_3E1APBSI  | <b>3,072</b>           | <b>3,084</b>           | 1,778                  | 1,787                  | -0,852                 | 1,796                  | 0,466                  | 0,461                  | 1,769                  | <b>3,072</b>           |
| 4A_4A1EPC    | <b>3,755</b>           | 1,629                  | -0,507                 | <b>3,791</b>           | <b>3,803</b>           | 1,649                  | -0,505                 | -0,507                 | 1,629                  | 1,622                  |
| 4A_4A2CPS    | <b>2,697</b>           | 0,276                  | 1,501                  | -0,934                 | 0,293                  | 1,518                  | 0,288                  | <b>2,72</b>            | 1,492                  | 0,27                   |
| 4B_4B1RE     | -0,51                  | -0,508                 | -0,507                 | 1,643                  | -0,504                 | -0,504                 | -0,505                 | 1,636                  | -0,508                 | -0,51                  |
| 4B_4B2TPC    | -0,253                 | -0,252                 | -0,251                 | -0,251                 | <b>4,022</b>           | -0,25                  | <b>4,011</b>           | <b>3,999</b>           | <b>3,988</b>           | -0,253                 |
| 4B_4B3DPEAC  | -0,44                  | -0,439                 | -0,438                 | -0,437                 | -0,435                 | <b>2,044</b>           | 2,037                  | -0,438                 | -0,439                 | <b>2,015</b>           |
| 4B_4B4FCSC   | 1,622                  | <b>3,767</b>           | 1,636                  | 1,643                  | 1,649                  | <b>3,803</b>           | -0,505                 | 1,636                  | 1,629                  | <b>3,755</b>           |
| 4C_4C1APCC   | -0,628                 | 1,129                  | 1,135                  | 1,141                  | -0,621                 | 1,147                  | 1,141                  | 1,135                  | -0,626                 | -0,628                 |
| 4D_4D1EA     | -0,253                 | -0,252                 | -0,251                 | <b>4,011</b>           | -0,25                  | -0,25                  | -0,251                 | -0,251                 | -0,252                 | -0,253                 |
| 4D_4D2UTVA   | <b>2,64</b>            | <b>2,649</b>           | -0,356                 | -0,355                 | -0,354                 | -0,354                 | -0,355                 | -0,356                 | -0,358                 | -0,359                 |
| 4D_4D3CI     | -0,359                 | -0,358                 | -0,356                 | -0,355                 | -0,354                 | -0,354                 | -0,355                 | -0,356                 | -0,358                 | 2,64                   |
