# Supplementary material for: Focus group on conflict management in the classroom in Secondary Education in Costa Rica: mixed methods approach
Source: PubMed Central journal article supplement (PMC11483860; doi:10.3389/fpsyg.2024.1407433), 2024-10-03
Supplement: Table_4.pdf [file Table_4.pdf]

**Table 4**

Adjusted residuals corresponding to the lag sequential analysis considering 4A1EPC as given behavior, all categories as conditioned behaviors, prospective lags R+1 to R+5, and retrospective lags R-1 to R-5.

| Codes        | Lag -5<br>4A_4A1EPC | Lag -4<br>4A_4A1EPC | Lag -3<br>4A_4A1EPC | Lag -2<br>4A_4A1EPC | Lag -1<br>4A_4A1EPC | Lag +1<br>4A_4A1EPC | Lag +2<br>4A_4A1EPC | Lag +3<br>4A_4A1EPC | Lag +4<br>4A_4A1EPC | Lag +5<br>4A_4A1EPC |
|--------------|---------------------|---------------------|---------------------|---------------------|---------------------|---------------------|---------------------|---------------------|---------------------|---------------------|
| 1A_1A1AV     | -0,301              | -0,301              | -0,3                | -0,299              | -0,298              | -0,298              | -0,299              | -0,3                | -0,301              | -0,301              |
| 1A_1A2AF     | -0,338              | -0,337              | -0,336              | -0,335              | -0,334              | -0,334              | -0,335              | -0,336              | -0,337              | -0,338              |
| 1A_1A3I      | -0,301              | -0,301              | -0,3                | -0,299              | -0,298              | -0,298              | -0,299              | -0,3                | -0,301              | -0,301              |
| 1A_1A4ICR    | -0,301              | -0,301              | -0,3                | -0,299              | -0,298              | -0,298              | -0,299              | <b>3,185</b>        | -0,301              | -0,301              |
| 1A_1A5CNR    | -0,338              | -0,337              | -0,336              | -0,335              | -0,334              | -0,298              | -0,299              | -0,259              | -0,26               | -0,26               |
| 1B_1B1DIRAC  | -0,802              | -0,818              | 0,643               | 0,608               | -0,846              | -0,863              | -0,866              | -0,869              | -0,872              | -0,875              |
| 1B_1B2FAI    | -0,51               | -0,508              | -0,531              | -0,529              | -0,528              | -0,528              | -0,529              | -0,531              | -0,533              | 1,513               |
| 1B_1B3RP     | -0,371              | -0,37               | -0,369              | -0,368              | -0,367              | -0,367              | -0,368              | -0,369              | -0,37               | -0,371              |
| 1C_1C1CO     | -0,26               | -0,26               | -0,259              | -0,258              | -0,257              | -0,257              | -0,258              | -0,259              | -0,26               | -0,212              |
| 1C_1C2NCIOP  | -0,431              | -0,43               | -0,429              | -0,427              | -0,426              | -0,426              | -0,427              | -0,429              | -0,43               | -0,431              |
| 1C_1C3DPC    | -0,26               | -0,26               | -0,259              | -0,258              | -0,257              | -0,257              | -0,258              | -0,259              | -0,26               | -0,26               |
| 1C_1C4NI     | -0,371              | -0,37               | -0,369              | -0,368              | <b>2,508</b>        | <b>2,508</b>        | -0,368              | -0,369              | -0,37               | -0,371              |
| 1D_1D1ICOP   | -0,212              | -0,211              | -0,211              | -0,21               | -0,21               | -0,21               | -0,21               | -0,211              | -0,211              | -0,212              |
| 1D_1D2NCOOP  | -0,26               | -0,26               | -0,259              | -0,258              | -0,257              | -0,257              | -0,258              | -0,259              | -0,26               | -0,26               |
| 1E_1E1EITD   | -0,26               | -0,26               | -0,259              | -0,258              | -0,257              | -0,257              | -0,258              | -0,259              | -0,26               | -0,26               |
| 1E_1E2DII    | -0,301              | -0,301              | -0,3                | -0,299              | -0,298              | -0,298              | -0,299              | -0,3                | -0,301              | -0,301              |
| 2A_2A1PEC    |                     | -0,579              | -0,577              | -0,575              | -0,573              | -0,573              | -0,553              | -0,554              | -0,533              | -0,534              |
| 2A_2A2CPEN   | -0,558              | 1,422               | -0,554              | -0,553              | -0,551              | -0,551              | -0,553              | -0,554              | -0,556              | -0,558              |
| 2B_2B1FC     | -0,431              | -0,43               | <b>2,063</b>        | -0,427              | -0,426              | -0,426              | -0,427              | -0,429              | -0,43               | -0,431              |
| 2B_2B2FIG    | -0,371              | -0,37               | -0,369              | -0,368              | -0,367              | -0,367              | -0,368              | -0,369              | -0,37               | -0,371              |
| 2C_2C1FHS    | -0,745              | 0,819               | -0,741              | -0,738              | 0,836               | -0,736              | 0,831               | 0,825               | -0,743              | 0,813               |
| 2C_2C2TCA    | -0,149              | -0,149              | -0,149              | -0,148              | -0,148              | -0,148              | -0,148              | 6,764               | -0,149              | -0,149              |
| 2C_2C3TCD    | -0,301              | -0,301              | -0,3                | -0,299              | -0,298              | -0,298              | -0,299              | -0,3                | -0,301              | -0,301              |
| 3A_3A1PSFAPC | 1,622               | 1,629               | -0,507              | -0,505              | 1,649               | <b>3,803</b>        | <b>3,791</b>        | -0,507              | 1,629               | 3,755               |
| 3B_3B1SIP    | 1,885               | -0,457              | -0,456              | -0,455              | -0,453              | 1,914               | 1,907               | 1,9                 | -0,457              | -0,459              |
| 3C_3C1UPCO   | -0,338              | -0,337              | <b>2,789</b>        | -0,335              | -0,334              | -0,334              | -0,335              | <b>2,789</b>        | -0,337              | -0,338              |
| 3D_3D1BIPGN  | -0,645              | -0,643              | -0,641              | 1,119               | -0,637              | -0,637              | -0,639              | -0,641              | 1,107               | 1,101               |
| 3E_3E1APBSI  | 1,622               | <b>3,767</b>        | 1,636               | 1,643               | 1,649               | -0,504              | -0,505              | -0,507              | -0,508              | -0,51               |
| 4A_4A1EPC    | -0,301              | -0,301              | -0,3                | -0,299              | -0,298              | -0,298              | -0,299              | -0,3                | -0,301              | -0,301              |
| 4A_4A2CPS    | -0,558              | <b>5,377</b>        | -0,554              | -0,553              | 1,441               | 1,441               | 1,435               | -0,554              | <b>3,399</b>        | 1,415               |
| 4B_4B1RE     | -0,301              | 3,175               | -0,3                | -0,299              | -0,298              | -0,298              | <b>3,195</b>        | -0,3                | -0,301              | -0,301              |
| 4B_4B2TPC    | -0,149              | -0,149              | -0,149              | <b>6,782</b>        | -0,148              | -0,148              | -0,148              | -0,149              | <b>6,745</b>        | -0,149              |
| 4B_4B3DPEAC  | -0,26               | -0,26               | -0,259              | -0,258              | -0,257              | -0,257              | -0,258              | -0,259              | -0,26               | -0,26               |
| 4B_4B4FCSC   | <b>3,165</b>        | -0,301              | -0,3                | <b>3,195</b>        | <b>3,204</b>        | <b>3,204</b>        | <b>3,195</b>        | -0,3                | -0,301              | <b>3,165</b>        |
| 4C_4C1APCC   | <b>2,475</b>        | -0,37               | <b>2,492</b>        | -0,368              | -0,367              | -0,367              | <b>2,5</b>          | <b>2,492</b>        | -0,37               | -0,371              |
| 4D_4D1EA     | -0,149              | -0,149              | -0,149              | -0,148              | <b>6,8</b>          | -0,148              | -0,148              | -0,149              | -0,149              | -0,149              |
| 4D_4D2UTVA   | -0,212              | -0,211              | 4,69                | <b>4,703</b>        | -0,21               | -0,21               | -0,21               | -0,211              | -0,211              | -0,212              |
| 4D_4D3CI     | 4,663               | -0,211              | -0,211              | -0,21               | -0,21               | -0,21               | -0,21               | -0,211              | -0,211              | -0,212              |
